# Supplementary material for: Retrospective study and implementation of a low-cost LAMP-turbidimetric assay for screening α0-thalassemia (SEA deletion): preventing and controlling Hb Bart’s hydrops fetalis syndrome in Thailand
Source: PeerJ. 2024 Feb 27;12:e17054. doi: 10.7717/peerj.17054 (PMC10906261; doi:10.7717/peerj.17054)
Supplement: Supplemental Information 2 [file peerj-12-17054-s002.xlsx]

## Sheet: Sheet2
Conventional gap-PCR	Price (USD)	LAMP assay with colorimetric	Price (USD)	LAMP assay with turbidimetric assay	Price (USD)
Multiplex gap PCR set: Commercial DNA taq polymerase, buffer, Primers, dNTP, others	6	WarmStart® Colorimetric LAMP 2x Master Mix	8.5	Bst 2.0 DNA Polymerase set (Inculuded MgSO4 and 10X isothermal amplification buffer)	0.6
Gel electrophoresis set	6	Primers, dNTP	0.5	Primers, dNTP	0.5
Control materials*	4.7
Total	16.7	Total	9	Total	1.1
Multiplex PCR Including SEA, THAI, FIL, MED, CR, 20.5 kb deletions, and 3.7 and 4.2 kb deletions		Singleplex for SEA deletion		Singleplex for SEA deletion
Negative/positive control	waive	Negative/positive control	waive	Negative/positive control	waive
*The remaining others control material for THAI, FIL, MED, 20.5 kb deletions, and 3.7 and 4.2 kb deletions
